# Supplementary material for: Phosphate binding by sucroferric oxyhydroxide ameliorates renal injury in the remnant kidney model
Source: PubMed Central journal article supplement (PMC6370755; doi:10.1038/s41598-018-38389-3), 2019-02-11

# Phosphate binding by sucroferric oxyhydroxide ameliorates renal injury in the remnant kidney model

Content type: Original article

Yoshikazu Nemoto<sup>1)</sup>, Takanori Kumagai<sup>1)</sup>, Ken-ichi Ishizawa<sup>1)</sup>, Yutaka Miura<sup>2)</sup>, Takeshi Shiraishi<sup>1)</sup>, Chikayuki Morimoto<sup>1)</sup>, Kazuhiro Sakai<sup>1)</sup>, Hiroki Omizo<sup>1)</sup>, Osamu Yamazaki<sup>1)</sup>, Yoshifuru Tamura<sup>1)</sup>, Yoshihide Fujigaki<sup>1)</sup>, Hiroshi Kawachi<sup>3)</sup>, Makoto Kuro-o<sup>2)</sup>, Shunya Uchida<sup>1)</sup>, Shigeru Shibata<sup>1), 4)</sup>

<sup>1)</sup>Division of Nephrology, Department of Internal Medicine, Teikyo University School of Medicine, Tokyo, Japan. <sup>2)</sup>Division of Anti-aging Medicine, Center for Molecular Medicine, Jichi Medical University, Tokyo, Japan. <sup>3)</sup>Department of Cell Biology, Kidney Research Center, Niigata University Graduate School of Medical and Dental Sciences, Niigata, Japan. <sup>4)</sup>Division of Clinical Epigenetics, Research Center for Advanced Science and Technology, The University of Tokyo, Tokyo, Japan.

Address correspondence to: Shigeru Shibata, MD., Ph.D., Division of Nephrology, Department of Internal medicine, Teikyo University School of Medicine, 2-11-1 Kaga, Itabashi-ku, Tokyo 173-8605, Japan. Phone: +81-3-3964-1211; e-mail:

shigeru.shibata@med.teikyo-u.ac.jp.

Supplemental Figure 1.

Full-length images of the gels and blots used in Figure 4a and Figure 8.

Nephrin (Fig 4a)

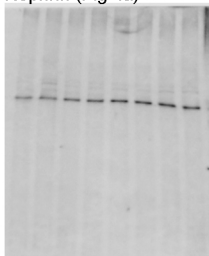

CBB (Fig 4a)

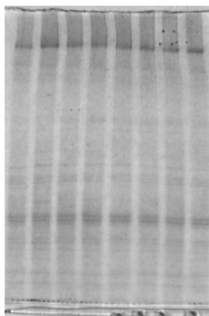

Klotho (Fig 8)

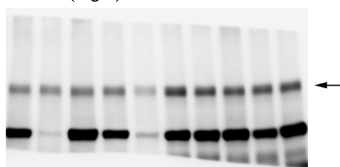

Tubulin (Fig 8)

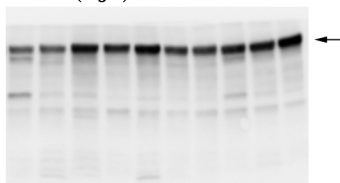

Supplement: 41598_2018_38389_MOESM1_ESM.pdf [file 41598_2018_38389_MOESM1_ESM.pdf]
